# Supplementary material
Source: PubMed Central journal article supplement (PMC4596683)
Supplement: 10.1534_115.180661_genetics.115.180661-1.pdf [file 10.1534_115.180661_genetics.115.180661-1.pdf]

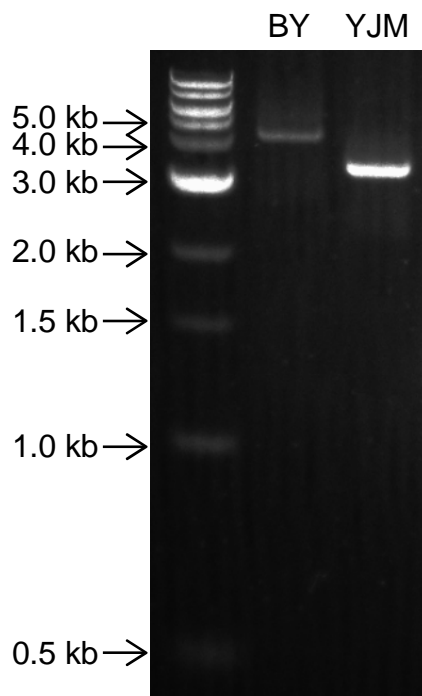

**Figure S3. Differences *FLO11* coding region length between BY and YJM.** PCR was used to amplify the *FLO11* coding region from the BY and YJM strains. The size of *FLO11*<sup>BY</sup> was ~4.1kb, while *FLO11*<sup>YJM</sup> was ~3.4kb.
