# Supplementary material
Source: PubMed Central journal article supplement (PMC4596683)
Supplement: 10.1534_115.180661_genetics.115.180661-8.pdf [file 10.1534_115.180661_genetics.115.180661-8.pdf]

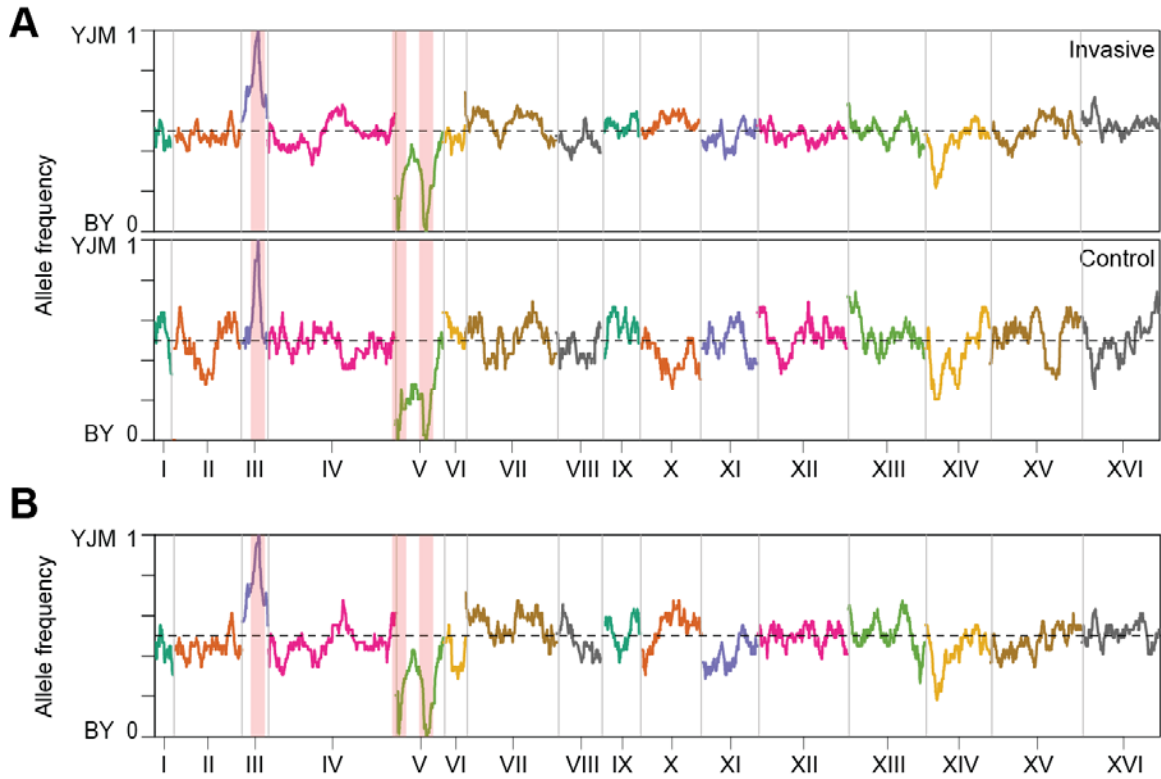

**Figure S2. Initial results from selective genotyping of segregants that show *FLO8*-independent invasion. (A) Comparison of genome-wide relative allele frequency plot among *FLO8<sup>BY</sup>* invasive progeny to a non-invasive *FLO8<sup>BY</sup>* control population. (B) Genome-wide relative allele frequency plot among *FLO8<sup>BY</sup>* segregants that invade on both glucose and ethanol.**
