# Supplementary material
Source: PubMed Central journal article supplement (PMC4596683)
Supplement: 10.1534_115.180661_genetics.115.180661-12.pdf [file 10.1534_115.180661_genetics.115.180661-12.pdf]

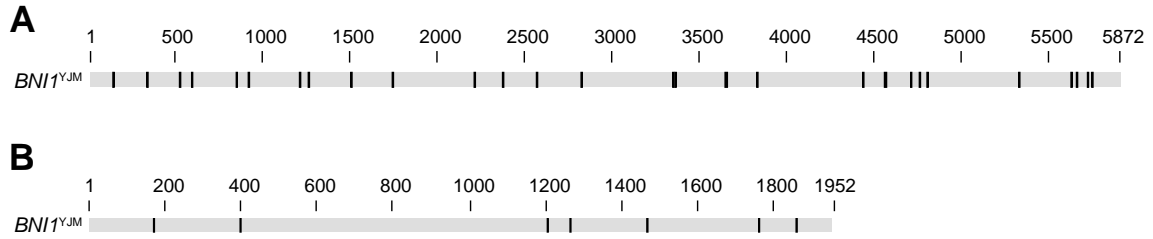

**Figure S5. Alignment of the *BNI1* gene.** (A) Alignment of the nucleotide sequences identified 31 SNPs between the BY and YJM allele of *BNI1*. (B) Alignment of the translated amino acid sequence revealed that 7 SNPs were nonsynonymous.
