# Supplementary material
Source: PubMed Central journal article supplement (PMC4596683)
Supplement: 10.1534_115.180661_genetics.115.180661-13.pdf [file 10.1534_115.180661_genetics.115.180661-13.pdf]

**Table S7. Analysis of dissected tetrads from homozygous diploid derivatives of specific segregants.** Phenotypes of spores from homozygous diploid versions of Segregants 1, 2, and 3.

| Segregant | Tetrad | MATa spore 1 | MATa spore 2 | MATalpha spore 1 | MATalpha spore 2 |
|-----------|--------|--------------|--------------|------------------|------------------|
| 1         | 1      | N            | N            | N                | N                |
| 1         | 2      | I            | N            | N                | N                |
| 1         | 3      | I            | N            | N                | N                |
| 1         | 4      | I            | I            | N                | N                |
| 1         | 5      | I            | I            | N                | N                |
| 1         | 6      | I            | I            | N                | N                |
| 1         | 7      | I            | I            | N                | N                |
| 1         | 8      | I            | I            | N                | N                |
| 1         | 9      | I            | I            | N                | N                |
| 1         | 10     | I            | I            | N                | N                |
| 2         | 1      | I            | I            | I                | I                |
| 2         | 2      | I            | I            | I                | I                |
| 2         | 3      | I            | I            | I                | I                |
| 2         | 4      | I            | I            | I                | I                |
| 2         | 5      | I            | I            | I                | I                |
| 2         | 6      | I            | I            | I                | I                |
| 2         | 7      | I            | I            | I                | I                |
| 3         | 1      | I            | I            | I                | I                |
| 3         | 2      | I            | I            | I                | I                |
| 3         | 3      | I            | I            | I                | I                |
| 3         | 4      | I            | I            | I                | I                |
| 3         | 5      | I            | I            | I                | I                |
| 3         | 6      | I            | I            | I                | I                |
| 3         | 7      | I            | I            | I                | I                |

I = Invasive, N = Non-invasive
